# Supplementary material for: Association of Transcriptomic Signatures of Inflammatory Response with Viral Control after Dendritic Cell-Based Therapeutic Vaccination in HIV-1 Infected Individuals
Source: MDPI journal article supplement (doi:10.3390/vaccines9070799), 2021-07-19
Supplement: s1 [file s1]

**Table 1.** Genes regulated by the nine significantly DE miRNAs.

| miRNA       | Number of validated regulated genes | Regulated genes                                                                                                                                                                                                                                                                                                                                                                                                                                                                                                                                                                                                                                                                                                                                                                                                                                                                                                                                                                                                                                                                                                                                                                                                                                                                                                            |
|-------------|-------------------------------------|----------------------------------------------------------------------------------------------------------------------------------------------------------------------------------------------------------------------------------------------------------------------------------------------------------------------------------------------------------------------------------------------------------------------------------------------------------------------------------------------------------------------------------------------------------------------------------------------------------------------------------------------------------------------------------------------------------------------------------------------------------------------------------------------------------------------------------------------------------------------------------------------------------------------------------------------------------------------------------------------------------------------------------------------------------------------------------------------------------------------------------------------------------------------------------------------------------------------------------------------------------------------------------------------------------------------------|
| miR_32_3p   | 118                                 | RL6IP6, ATAD5, AZF1, BAAT, BBS10, BTBD3, C5ORF24, C7ORF60, CAPZA2, CARKD, CC2D2A, CCDC71L, CELF1, CHORDC1, CIDEC, COL23A1, CREBL2, CYB5R4, DYNC1LI1, E2F3, EFCAB14, EID1, FAM169A, FAT3, FBLN2, FGFR1OP, FOXC1, FZD6, GPBP1L1, GPC6, GPSM2, HBP1, HDCC2, HMGN1, HNRNPA3, HNRNPR, HOXA10, HOXD11, IL7R, INIP, KIAA1614, KIAA1958, KIF3A, KIF5B, LAPTM4B, LINC00346, LYN, MAP3K12, MED10, MED12L, MKL2, MON1B, MRPL36, MYADM, N4BP1, NAMPT, NCALD, NCOA7, NHS, PAXBP1, PCDHB16, PEG10, PHC3, PHKA1, PPARGC1A, PPIF, PPIL2, PPP1R15B, PPP6R3, PPWD1, PROSC, PTP4A1, RANGAP1, RBPJ, RDH11, RFX7, RNF125, RORA, RSL24D1, SBNO1, SETBP1, SF3A1, SGMS1, SIGLEC9, SMTN, SNX24, SNX4, SPAST, SRSF10, SUMO2, TCF7L2, TM4SF1, TMEM192, TMEM2, TMEM30A, TMEM67, TMF1, TRPC5, TSR1, TVP23C, TWF1, UBE2S, UHMK1, USMG5, USP37, VLDLR, VPS33A, VPS4A, WDR37, WNK1, WTIP, YWHAE, YWHAH, ZDHHC20, ZNF292, ZNF410, ZNF567, ZNF573                                                                                                                                                                                                                                                                                                                                                                                                            |
| miR_185_3p  | 67                                  | ABCC5, ADCY9, ADRBK2, AKAP2, ANKRD13B, ARHGAP40, ASB6, BARHL1, CACNA1C, CERS1, CNBP, CNOT3, DDX39B, FAM151B, FARSa, FOLR1, GK5, HIST1H1B, HMGA1, HSP90AB1, HSPA14, IDS, ITPRIPL1, MAPK1, MKNK2, MTHFSD, NF2, PALM2-AKAP2, PEX26, PIAS4, PIM3, POLR3G, POMGNT1, PPP1R11, PPP2CA, PSMB6, PTDSS2, RAB5B, RGS6, SCAF4, SCN2B, SEMA3F, SERF1A, SERF1B, SFT2D2, SLC10A3, SLC27A1, SOX4, STAC, SYNGR2, TET3, TEX261, TFPI, THRA, TIMM8A, TMEM109, TMEM63C, TRIP10, TXNRD3NB, U2SURP, UNK, USP37, VAV3, VPS37C, WBSCR16, ZBTB7A, ZNF689                                                                                                                                                                                                                                                                                                                                                                                                                                                                                                                                                                                                                                                                                                                                                                                            |
| miR_223_3p  | 85                                  | ABCB1, ARL8B, ARTN, ATM, BAG2, C9orf40, CACNG8, CAPRIN1, CARM1, CCL3, CDC27, CDK2, CDS1, CFTR, CHMP2B, CHUK, CXCL2, CYB5A, E2F1, ECT2, EPB41L3, F3, FABP7, FAM60A, FBXW7, FOXO1, FOXO3, GPATCH8, HEXIM1, HSP90B1, IGF1R, IL6, IL6ST, IRS1, ITGB1, LATS2, LIF, LMO2, MDM2, MEF2C, MKNK2, MSMO1, MTRF1L, NAMPT, NFIA, NFIX, NMNAT2, NOVA2, NSUN3, PARP1, PAX4, PAX6, PDZD8, PHF19, POLR3G, PRDM1, PTBP2, RANGAP1, RHOB, RIF1, RRAS2, SCARB1, SECISBP2L, SEPT2, SESN3, SLC2A4, SLC7A5, SMARCD1, SNX24, SP1, SP3, SPPL2A, STAT5A, STMN1, TAL1, TMEM64, TMEM67, TOX, TP53, TRPV2, TWF1, WASL, ZBTB18, ZNF365, ZNF460                                                                                                                                                                                                                                                                                                                                                                                                                                                                                                                                                                                                                                                                                                            |
| miR_500b_3p | 171                                 | ABCA6, ABL2, ACOT9, ADCY2, ADM, AGRN, AK1, ALG14, AMMECR1L, ANO6, AP3B2, APOB, ARHGAP27, ARL17B, ARMC12, ARDC2, ASCC1, BARD1, BTLA, C16orf45, C17orf104, C3orf18, C8A, CCDC134, CCDC142, CCDC80, CCR6, CDCA4, CDK6, CERS4, CHDH, CHMP3, CLIC5, CLMN, COX19, CXorf38, CYTH2, DDX19B, DYNLL2, EFTUD2, ERC1, ESF1, FADS6, FAM213A, FAM229B, FBXL2, FGF1, FLG2, FXN, GEMIN6, GOSR1, GREM2, HDGF, HEBP2, HIF1AN, HLA-E, HNRNPK, ICOSLG, IDS, IGSF9B, IL1RL2, ISCA2, ITPA, ITPKC, JPH2, KAT7, KBTBD6, KCTD15, KDELC2, KDELR1, KIAA0930, KIAA1549, KIAA1551, KIAA1919, LEAP2, MASTL, MED18, METTL2B, MIDN, MOGAT1, MRPL45, MRPL52, MSANTD4, MTMR10, MUC20, MVB12B, MYLK3, N4BP2L2, NIPAL1, NLN, NOVA2, NPEPPS, NUDT3, OPRD1, OPTN, PAICS, PCSK2, PCSK9, PGBD4, PGBD5, PHC3, PIGG, PLEKHA3, POLM, POLQ, POLR3A, POM121L7, PRIM1, PTCH1, PTPLAD2, PXMP4, PYCRL, PYGO1, QPRT, RANGAP1, RBM27, RBM43, REL, RHBDL2, RHOH, RNF103-CHMP3, RNF115, RRAD, RTTN, SAMD8, SAR1A, SENP3, SF3A3, SGOL1, SLC16A10, SLC1A5, SLC26A2, SLC2A6, SLC31A1, SLC35B4, SMOC1, STAR, STAT3, STRN3, TARS, TDRD1, TIGD6, TLDC1 TMEM119, TMEM120B, TMEM55A, TMEM74B, TMOD2, TNFRSF13C, TNFSF8, TNRC6B, TRIM58, UBE2G2, UNC119B, WDR81, WRN, WT1, ZBTB7A, ZBTB8A, ZC3H12C, ZDHHC8, ZFP14, ZFPM1, ZNF439, ZNF460, ZNF491, ZNF554, ZNF74, ZNF786, ZNF845, ZYG11B |
| miR_550a_3p | 40                                  | ABCF2, ACTR1A, C2orf72, CMIP, CNIH, CXCL10, DNAJA3, EFHB, EID2, FEM1B, GTF2E1, HPS4, HSP90AA1, KCNE4, KDELR2, MDM2, MTAP, OR7D2, PKIA, POLR2F, POLR3K, PXMP4, RBM8A, SC5D, SLC11A2, SLC35F6, SYNCRIIP, TM4SF19, TMEM50B, TRAF1, TUBD1, TXLNG, URM1, YOD1, YWHAE, YY2, ZC3H12C, ZNF525, ZNF621, ZNF703                                                                                                                                                                                                                                                                                                                                                                                                                                                                                                                                                                                                                                                                                                                                                                                                                                                                                                                                                                                                                      |
| miR_1183    | 77                                  | ALG13, AMACR, ARF6, ARPP19, ATP6V0A2, ATXN7L1, BICD2, C11ORF58, C19orf35, C21orf91, CEP135, CHML, CREB1, CRLF3, CSNK2A1, DCAF7, DEK, DONSON, ELL2, ERBB2IP, FAM53C, FEM1C, FLVCR1, GATA6, GPATCH8, GRAP2, GRHL1, HECTD1, HHLA1, HMGB1, HSPA4L, IL20RB, IPMK, IST1, KIAA0232, KLHDC10, LAMTOR1, LRCH3, MAP3K9, MAPK14, MEOX2, MOB1B, N4BP2, NFATC2, NPTN, NUP188, OSMR, PDPK1, PEX3, PIAS1, PLEKHA1, PLEKHF2, POLR3F, PRAMEF1, PSME4, RACGAP1, RBBP4, RLN1, RWDD2A, SEP15, SERPINA4, SGIP1, SHCBP1, STAT1, STRBP, SYNM, TMED7, TMEM164, TNFSF15, TNKS, TYRP1, UBL3, ZC3H12C, ZC3H6, ZHX3, ZNF35, ZNF608                                                                                                                                                                                                                                                                                                                                                                                                                                                                                                                                                                                                                                                                                                                     |

|          |     |                                                                                                                                                                                                                                                                                                                                                                                                                                                                                                                                                                                                                                                                                                                                                                                                                                                                                                                                                                                                                                                                                                                                                                                                                                                                                                                                                                                                                    |
|----------|-----|--------------------------------------------------------------------------------------------------------------------------------------------------------------------------------------------------------------------------------------------------------------------------------------------------------------------------------------------------------------------------------------------------------------------------------------------------------------------------------------------------------------------------------------------------------------------------------------------------------------------------------------------------------------------------------------------------------------------------------------------------------------------------------------------------------------------------------------------------------------------------------------------------------------------------------------------------------------------------------------------------------------------------------------------------------------------------------------------------------------------------------------------------------------------------------------------------------------------------------------------------------------------------------------------------------------------------------------------------------------------------------------------------------------------|
| miR_1184 | 86  | ARL5C, ATG12, BDP1, CAPN1, CEP89, CREBRF, CRK, CRKL, CSNK2A1, DCC, DICER1, DNASE1L3, DRAXIN, EHD3, EIF1AX, ENPP2, ERN1, FAM98A, FBXL20, FEM1A, G3BP1, GCC1, GGA2, GLUL, GPCPD1, GSTO2, HIST1H2BK, HMGA1, HOXA13, IBA57, IDH3A, IL6R, JPH2, KDELR1, KIAA1549, LAX1, LSM14A, LY6G6E, MIS18A, MIS18BP1, MPDU1, MRS2, MTA1, NLRC5, NOA1, NPY4R, NR6A1, NUMB, OTOF, PANK3, PDPR, PHF12, PICALM, PIKFYVE, PLIN5, PLXND1, POLDIP2, RAB1A, RNF11, SESN2, SETD1B, SF1, SLC25A45, SLC30A3, SLC6A4, SMARCE1, SNX9, SRSF9, STX16, SYNRG, TECPR1, TMED10, TMEM109, TMEM132C, TMEM170A, TNFAIP1, UBE2G1, UBE2H, VGLL4, VPS8, XPO5, ZBTB24, ZDHHC6, ZMIZ2, ZNF442, ZNF483                                                                                                                                                                                                                                                                                                                                                                                                                                                                                                                                                                                                                                                                                                                                                         |
| miR_4455 | 133 | ACP1, ADRBK2, ADRM1, AGPAT5, ANO8, APOL6, ARSK, BDH1, BUB1, C16ORF72, C19orf52, CACUL1, CAMK2N1, CAMK4, CASZ1, CBX1, CD40LG, CDH12, CDK15, CDKN1A, CDON, CLEC2D, CNTF, COX6B1, CPM, CUX2, CYP7B1, DBT, DHODH, DIABLO, DMD, DNAJC6, DOCK1, EDA2R, EEA1, EEF2, EN2, FAM117B, FAM69C, FAM83C, FAXC, FGF14, GLI2, GPBP1L1, GXYLT2, IL2RB, JAKMIP2, KANSL1L, KATNAL1, KCNQ3, KCNQ5, KIAA1549L, KIF1C, LEPREL1, LHFP, LIPC, LPP, LRRC10, MAN1A2, MAPK10, MARCH3, MARCH4, MED28, MOCS3, MPEG1, MTHFD1, MTRNR2L11, NACC2, NCAN, NCOA3, NMNAT2, NR2E1, NUP93, ONE-CUT3, PARP2, PAX5, PGBD4, PLAC8, PLEKHA1, PORCN, PPP1R16B, PRIM1, PRKCB, PRRT2, PTCHD1, PYGO1, RAB3C, RAP2B, ROCK2, SAMD9L, SBK1, SEPT6, SESN2, SETD1B, SETD5, SF3B3, SH3TC2, SIM1, SLC16A13, SLC35F6, SLC43A3, SLCO4C1, SPPL3, SPRY4, SYT2, TBX4, TCTE1, TGOLN2, TMED4, TMPRSS6, TNF, TNS4, TRAF3, TTLL7, TXNL4B, TYRO3, UBE2Q1, UBN2, UGT2B4, VAMP4, VANGL1, WNT4, XKR6, YOD1, ZBED3, ZC3H4, ZDHHC20, ZEB1, ZNF131, ZNF382, ZNF529, ZNF556, ZNF878                                                                                                                                                                                                                                                                                                                                                                                                      |
| miR_8063 | 181 | AAK1, ACTB, ACVR1C, ADCYAP1R1, AGO3, ALAD, ALKBH5, AMOTL2, AP5M1, ARHGAP12, ARL5B, ASH2L, ATG9A, ATP6V1C1, AVPR1A, BCL2L11, BDP1, BRPF3, BTF3L4, BTG3, C12orf29, C12orf5, C16orf52, C16orf72, C17orf105, C19orf44, C1GALT1, CALCR, CAPN7, CCDC108, CCDC71L, CCND2, CCNL2, CDC42BPA, CENPH, CENPL, CEP85L, CLSPN, CMTM6, CPT1B, CRNKL1, CTDSPL, CXCL5, CYBRD1, DCTN4, DCTN6, DEPDC1, DEPTOR, DIP2A, DNAJC10, DNAJC21, DST, E2F2, EDIL3, EDN3, EHD4, EIF1AX, ELAVL1, ELAVL2, EMC3, EPHA2, ERBB3, EXOC5, EXOC8, FAM103A1, FAM129A, FAM216B, FAR2, FBXO28, FEM1B, FKBP15, FRK, FSIP2, FUT11, GABRB2, GALM, GATA6, GATAD1, GLRX2, GNG12, GPR151, GRAMD3, HAS2, HEPHL1, HIST1H2BD, HIST1H3E, HNRNPC, HNRNPDL, IFNB1, IL5, IRF2BP2, JAG1, JAZF1, KDSR, KIAA0101, KIAA1614, KIT, L3MBTL2, LIMD1, LMNB2, LRRC4, LSM3, MAP3K2, MAPT, MMS22L, MOCS2, MON1B, MRPS10, MUT, MVK, MYLK, NAA38, NECAB1, NHLRC2, NOX5, NUDT21, ODF4, OTUD7B, PAFAH1B2, PAIP1, PAK2, PAK3, PDE1A, PEG10, PITX3, POLR1A, POU5F1B, PPIL2, PRDM5, PRDX3, PRKAA1, PTPDC1, QRSL1, RCAN1, RNF165, RPS4Y1, SCOC, SEC22C, SEPT2, SETD5, SGCD, SLC19A3, SLC35E2, SLC38A9, SMU1, SPATA13, SPOP, SPRED1, SPRED3, STRBP, SZRD1, TAB2, TACC1, TCF7L2, TENM4, TES, TESPA1, TGFB1, TIGD2, TMED7, TMEM119, TMEM59, TMEM67, TNFSF15, TRAFD1, TRAPPC4, TSPAN12, TTC39C, TWISTNB, U2AF2, USP48, VIM, WAPAL, WNK1, XKR4, YIPF6, ZDHHC21, ZDHHC23, ZNF426, ZNF573, ZNF770 |

**Table 2.** The overlap between the genes regulated by the 9 DE miRNAs and the significant gene sets obtained in the GSEA performed with the Broad hallmark gene sets.

| miRNA        | Number of regulated genes [n] | Number of Broad hallmark gene sets with significant (FDR q-value < 0.05) gene overlap [n (%)] | Number of overlapping Broad hallmark gene sets that are significantly up- or down-regulated in the mRNA analysis [n(%)] | Overlapping Broad hallmark gene sets up- or down-regulated in the mRNA analysis                                                                                                                                            |
|--------------|-------------------------------|-----------------------------------------------------------------------------------------------|-------------------------------------------------------------------------------------------------------------------------|----------------------------------------------------------------------------------------------------------------------------------------------------------------------------------------------------------------------------|
| miR_32_3p    | 118                           | 2 (4.0%)                                                                                      | 2 (100.0%)                                                                                                              | Hypoxia, Myc targets v1                                                                                                                                                                                                    |
| miR_185_3p   | 67                            | 1 (2.0%)                                                                                      | 0 (0.0%)                                                                                                                | -                                                                                                                                                                                                                          |
| miR_223_3p   | 85                            | 23 (46.0%)                                                                                    | 10 (43.5%)                                                                                                              | TNFA signaling via NFkB, KRAS signaling up, G2M checkpoint, Hypoxia, IL2-STAT5 signaling, Inflammatory response, Apoptosis, Mitotic spindle, Epithelial mesenchymal transition, IL6-JAK-STAT3 signaling                    |
| miR_500b_3p  | 171                           | 0 (0.0%)                                                                                      | 0 (0.0%)                                                                                                                | -                                                                                                                                                                                                                          |
| miR_550a_3p  | 40                            | 0 (0.0%)                                                                                      | 0 (0.0%)                                                                                                                | -                                                                                                                                                                                                                          |
| miR_1183     | 77                            | 0 (0.0%)                                                                                      | 0 (0.0%)                                                                                                                | -                                                                                                                                                                                                                          |
| miR_1184     | 86                            | 0 (0.0%)                                                                                      | 0 (0.0%)                                                                                                                | -                                                                                                                                                                                                                          |
| miR_4455     | 133                           | 2 (4.0%)                                                                                      | 0 (0.0%)                                                                                                                | -                                                                                                                                                                                                                          |
| miR_8063     | 181                           | 4 (8.0%)                                                                                      | 3 (75.0%)                                                                                                               | Apoptosis, Cholesterol homeostasis, Epithelial mesenchymal transition                                                                                                                                                      |
| All 9 miRNAs | 899                           | 31 (62.0%)                                                                                    | 12 (38.7%)                                                                                                              | G2M checkpoint, IL2-STAT5 signaling, TNFA signaling via NFkB, Inflammatory response, Myc targets v1, Mitotic spindle, Hypoxia, E2F targets, KRAS signaling up, Apoptosis, IL6-JAK-STAT3 signaling, Cholesterol homeostasis |
